# Supplementary material for: Over-the-counter provision of emergency contraceptive pills: a systematic review
Source: HighWire-hosted journal article supplement (doi:10.1136/bmjopen-2021-054122), 2022-03-01
Supplement: bmjopen-2021-054122supp002_data_supplement.pdf [file bmjopen-2021-054122supp002_data_supplement.pdf]

**WHO self-care v2 (2020)****Over the counter emergency contraception****Search strategy documentation**

Search date: 27 April 2020 / updated 02 Dec 2020

Total hits: 3902

After removing duplicates: 2581

Assigned for primary screening: 2581

**Pubmed: 1492 hits**

("Contraceptives, Oral" [Mesh] OR "Contraceptives, Postcoital" [Mesh] OR "emergency contraceptive pill" [tiab] OR "emergency contraceptive pills" [tiab] OR "morning-after pill" [tiab] OR "Plan B One-Step" [tiab] OR "Take Action" [tiab] OR "Next Choice One-Dose" [tiab] OR "My Way" [tiab] OR "AfterPill" [tiab] OR "Preventeza" [tiab] OR "My Choice" [tiab] OR "Aftera" [tiab] OR "Athentia Next" [tiab] OR "EContra Ez" [tiab] OR "Fallback Solo" [tiab] OR "Opcicon One-Step" [tiab] OR "Option 2" [tiab] OR "Afirmelle" [tiab] OR "Altavera" [tiab] OR "Amethia" [tiab] OR "Amethia Lo" [tiab] OR "Amethyst" [tiab] OR "Aubra" [tiab] OR "Ayuna" [tiab] OR "Aviane" [tiab] OR "Camrese" [tiab] OR "CamreseLo" [tiab] OR "Chateal" [tiab] OR "Cryselles" [tiab] OR "Elinest" [tiab] OR "Enpresse" [tiab] OR "Falmina" [tiab] OR "Introvale" [tiab] OR "Jolessa" [tiab] OR "Kurvelo" [tiab] OR "Lessina" [tiab] OR "Lenovest" [tiab] OR "Levora" [tiab] OR "LoSeasonique" [tiab] OR "Low-Ogestrel" [tiab] OR "Lutera" [tiab] OR "Marlissa" [tiab] OR "Myzilra" [tiab] OR "Nordette" [tiab] OR "Orsythia" [tiab] OR "Portia" [tiab] OR "Quasense" [tiab] OR "Seasonale" [tiab] OR "Seasonique" [tiab] OR "Setlakin" [tiab] OR "Sronyx" [tiab] OR "Triphasil" [tiab] OR "Trivora" [tiab] OR "Vienva" [tiab] OR "After-1" [tiab] OR "Agesta" [tiab] OR "Ai Wu You" [tiab] OR "Aleze EC" [tiab] OR "Alterna" [tiab] OR "Amor" [tiab] OR "An Ting" [tiab] OR "Anlitin" [tiab] OR "Anthia" [tiab] OR "Auxil" [tiab] OR "Bao Shi Ting" [tiab] OR "Bi Yun" [tiab] OR "Ciel EC" [tiab] OR "Contragest" [tiab] OR "Contraplan II" [tiab] OR "Control NF" [tiab] OR "Control Uno" [tiab] OR "Copill" [tiab] OR "Curesinor" [tiab] OR "D-Sigyent" [tiab] OR "Dan Mei" [tiab] OR "Dia S MP" [tiab] OR "Diad" [tiab] OR "Dreams" [tiab] OR "Duet" [tiab] OR "Duprisal 30" [tiab] OR "Dvella" [tiab] OR "E Pills" [tiab] OR "E-72" [tiab] OR "e-con" [tiab] OR "ECee2" [tiab] OR "ECP" [tiab] OR "ella" [tiab] OR "ellaOne" [tiab] OR "Emcon" [tiab] OR "Emergyn" [tiab] OR "Emkit" [tiab] OR "Emkit Plus" [tiab] OR "Escapel" [tiab] OR "Escapel-1" [tiab] OR "Escapel-2" [tiab] OR "Escapelle" [tiab] OR "Escinor" [tiab] OR "Estinor" [tiab] OR "Evadir 2" [tiab] OR "Evital" [tiab] OR "Evitarem" [tiab] OR "Fermerleve Sagiram" [tiab] OR "Feminor" [tiab] OR "Fertilan" [tiab] OR "Fu Nai Er" [tiab] OR "G-Nancy" [tiab] OR "Glanique" [tiab] OR "Glanix" [tiab] OR "Glostinor 2" [tiab] OR "Gynepriston" [tiab] OR "Gynotrel 2" [tiab] OR "Hispratel" [tiab] OR "Hou Ding Nuo" [tiab] OR "Hua Dian" [tiab] OR "Hui Ting" [tiab] OR "i-pill" [tiab] OR "Imediat" [tiab] OR "Imediat N" [tiab] OR "Impreviat" [tiab] OR "Jin Xiao" [tiab] OR "Jin Yu Ting" [tiab] OR "Ka Rui Ding" [tiab] OR "L Novafem" [tiab] OR "Laliades" [tiab] OR "Le Ting" [tiab] OR "Lenor 72" [tiab] OR "Levo-72" [tiab] OR "Levodonna" [tiab] OR "Levogest" [tiab] OR "Levogynon 1500" [tiab] OR "Levonelle" [tiab] OR "Levonelle-1" [tiab] OR "Levonon" [tiab] OR "Levonorgestrel Biogaran 1500" [tiab] OR "Levonorgestrel Richter" [tiab] OR "Levonormin" [tiab] OR "Lonel" [tiab] OR "Longil" [tiab] OR "Lydia 1Safe Pill" [tiab] OR "Lydia Post Pill" [tiab] OR "Madonna" [tiab] OR "Max-72" [tiab] OR "Me Tablet" [tiab] OR "Mergynex" [tiab] OR "Mifepristone 72" [tiab] OR "Mifestad 10" [tiab] OR "Minipil 2" [tiab] OR "Morning After" [tiab] OR "MS Pill" [tiab] OR "Negele" [tiab] OR "Nerostinor" [tiab] OR "Next Choice" [tiab] OR "Nicpostinew" [tiab] OR "Nogestrol" [tiab] OR "Nogravide" [tiab] OR "Norgestrel Max Unidosis" [tiab] OR "Norgestrel-Max" [tiab] OR "NorLevo" [tiab] OR "Nortrel 2" [tiab] OR "Novalen" [tiab] OR "Oportuna" [tiab] OR "Optinor" [tiab] OR "Ovocease" [tiab] OR "Ovulol" [tiab] OR "P2" [tiab] OR "PiDaNa" [tiab] OR "Pilem" [tiab] OR "Pill 72" [tiab] OR "Pillanor 2" [tiab] OR "Pillel" [tiab] OR "Pilule S" [tiab] OR "Planfam" [tiab] OR "Poslov" [tiab] OR "PostDay" [tiab] OR "Poster Tablets" [tiab] OR "Postiga 4" [tiab] OR "Postinor" [tiab] OR "Postinor 1"

[tiab] OR "Postinor 1.5" [tiab] OR "Postinor 1500" [tiab] OR "Postinor 2 SD" [tiab] OR "Postinor Duo" [tiab] OR "Postinor Life" [tiab] OR "Postinor PI" [tiab] OR "Postinor Uno" [tiab] OR "Postinor-2" [tiab] OR "Postinor-2 Unidosis" [tiab] OR "Postpill" [tiab] OR "Pozato" [tiab] OR "Pozato Uni" [tiab] OR "PPMS" [tiab] OR "Pregnon" [tiab] OR "Pregnon 1" [tiab] OR "Pregnon 1.5" [tiab] OR "Prevemb" [tiab] OR "Preventol" [tiab] OR "Previdez 2" [tiab] OR "Previfem" [tiab] OR "Prevyl" [tiab] OR "Prikul" [tiab] OR "Pronta" [tiab] OR "Prudence for Her" [tiab] OR "Rely-X" [tiab] OR "Revoke 1.5" [tiab] OR "Revoke 72" [tiab] OR "Rigesoft" [tiab] OR "Rogotinor" [tiab] OR "Secufem" [tiab] OR "Seguidet" [tiab] OR "Segurit" [tiab] OR "Segurite UD" [tiab] OR "SEKURE" [tiab] OR "Sendinor 2" [tiab] OR "Sexcon One&One" [tiab] OR "Si Mi An" [tiab] OR "Silogin" [tiab] OR "Smart Lady (Pregnon)" [tiab] OR "So-Ezzy" [tiab] OR "Tace" [tiab] OR "Tibex" [tiab] OR "Truston-2" [tiab] OR "Ulipristal 30" [tiab] OR "Unlevo 1500" [tiab] OR "Unofem" [tiab] OR "Unwanted 72" [tiab] OR "Upostelle" [tiab] OR "UPRIS" [tiab] OR "Vermagest" [tiab] OR "Vika" [tiab] OR "Vikela" [tiab] OR "Vonstrel" [tiab] OR "Xian Ju" [tiab] OR "Yi Ting" [tiab] OR "Yu Ting" [tiab] OR "Zimtemore" [tiab])

AND

("Nonprescription Drugs" [Mesh] OR nonprescription [tiab] OR "over the counter" [tiab] OR "over-the-counter" [tiab] OR "without a prescription" [tiab] OR "pharmacist-prescribed" [tiab] OR "pharmacy access" [tiab] OR "clinician-prescribed" [tiab] OR "physician-prescribed" [tiab] OR "GP-prescribed" [tiab] OR "general practitioner prescribed" [tiab] OR "without prescription" [tiab] OR "community pharmacy services" [Mesh] OR "community center" [tiab] OR "community centre" [tiab] OR store [tiab] OR shop [tiab] OR online [tiab] OR mobile [tiab] OR telehealth [tiab])

**CINAHL: 184 hits**

AB ("Contraceptives postcoital" OR "emergency contraception" OR "emergency contraceptive" OR "emergency contraceptives" OR "morning after pill" OR "plan b") AND AB ("Nonprescription Drugs" OR nonprescription OR "over the counter" OR "over-the-counter" OR "without a prescription" OR "pharmacist-prescribed" OR "pharmacy access" OR "clinician-prescribed" OR "physician-prescribed" OR "GP-prescribed" OR "general practitioner prescribed" OR "without prescription" OR "community center" OR "community centre" OR store OR shop OR online OR mobile OR telehealth)

**LILACS: 204 hits**

Title/abstract/subject: ("Contraceptives postcoital" OR "emergency contraception" OR "emergency contraceptive" OR "emergency contraceptives" OR "morning after pill" OR "plan b")

**EMBASE: 494 hits**

AB, TI ('Contraceptives postcoital' OR 'emergency contraception' OR 'emergency contraceptive' OR 'emergency contraceptives' OR 'morning after pill' OR 'plan b') AND AB, TI ('Nonprescription Drugs' OR nonprescription OR 'over the counter' OR 'over-the-counter' OR 'without a prescription' OR 'pharmacist-prescribed' OR 'pharmacy access' OR 'clinician-prescribed' OR 'physician-prescribed' OR 'GP-prescribed' OR 'general practitioner prescribed' OR 'without prescription' OR 'community center' OR 'community centre' OR store OR shop OR online OR mobile OR telehealth)
