# Supplementary material for: Over-the-counter provision of emergency contraceptive pills: a systematic review
Source: HighWire-hosted journal article supplement (doi:10.1136/bmjopen-2021-054122), 2022-03-01
Supplement: bmjopen-2021-054122supp003_data_supplement.pdf [file bmjopen-2021-054122supp003_data_supplement.pdf]

## Appendix 3: Risk of Bias Assessments

Non-Randomized Trials (n=18): Evidence Project Risk of Bias Tool

| Citation ID                             | Pre/Post | Comp. group | Cohort | Baseline Equivalence |         | Random selection | Random allocation | Control for confounders | Follow-up >=75% | Specific Concerns                                    |
|-----------------------------------------|----------|-------------|--------|----------------------|---------|------------------|-------------------|-------------------------|-----------------|------------------------------------------------------|
|                                         |          |             |        | Demos                | Outcome |                  |                   |                         |                 |                                                      |
| <b>Arnet et al. 2009 [23]</b>           | Yes      | No          | No     | NA                   | NA      | No               | No                | No                      | NA              | Lack of comparison group, no control for confounding |
| <b>Atkins &amp; Bradford 2015 [25]</b>  | Yes      | No          | No     | NA                   | NA      | No               | No                | Yes                     | NA              | Lack of comparison                                   |
| <b>Atkins 2014 [24]</b>                 | Yes      | No          | No     | NA                   | NA      | No               | No                | Yes                     | NA              | Lack of comparison                                   |
| <b>Bumbul et al. 2013 [26]</b>          | No       | Yes         | No     | No                   | NA      | NR               | No                | No                      | NA              | No pre/post, no control for confounding              |
| <b>Cintina &amp; Johansen 2015 [28]</b> | No       | Yes         | No     | NR                   | NA      | No               | No                | Yes                     | NA              | No pre/post                                          |
| <b>Cintina 2017 [27]</b>                | Yes      | No          | No     | NA                   | NA      | No               | No                | Yes                     | NA              | Lack of comparison                                   |
| <b>Durrance 2013 [29]</b>               | Yes      | No          | No     | NA                   | NA      | No               | No                | Yes                     | NA              | Lack of comparison                                   |
| <b>Falah-Hassani, et al. 2007 [30]</b>  | Yes      | No          | No     | NA                   | NA      | Yes              | NA                | No                      | NA              | Lack of comparison, no control for confounding       |

|                                       |     |     |     |    |    |     |    |     |    |                                                      |
|---------------------------------------|-----|-----|-----|----|----|-----|----|-----|----|------------------------------------------------------|
|                                       |     |     |     |    |    |     |    |     |    | (though random selection)                            |
| <b>Girma &amp; Paton 2011[31]</b>     | No  | Yes | No  | No | NA | No  | No | Yes | NA | No pre/post                                          |
| <b>Killick &amp; Irving 2004 [33]</b> | No  | Yes | No  | NR | NR | No  | No | No  | NA | No pre/post, no control for confounding              |
| <b>Marston et al. 2005 [34]</b>       | Yes | No  | No  | NA | NA | Yes | No | Yes | NA | Lack of comparison                                   |
| <b>Moreau et al. 2006 [35]</b>        | Yes | No  | No  | NA | NA | Yes | No | Yes | NA | Lack of comparison                                   |
| <b>Mulligan 2016 [36]</b>             | Yes | No  | Yes | NA | NA | NR  | No | Yes | NR | Lack of comparison                                   |
| <b>Novikova et al. 2009 [37]</b>      | Yes | No  | No  | NA | NA | No  | No | No  | NA | Lack of comparison group, no control for confounding |
| <b>Payakachat et al. 2010 [38]</b>    | Yes | No  | No  | NA | NA | No  | No | No  | NA | Lack of comparison group, no control for confounding |
| <b>Pentel et al. 2004 [39]</b>        | Yes | No  | No  | NA | NA | No  | No | No  | NA | Lack of comparison group, no control for confounding |
| <b>Rubin et al. 2011 [42]</b>         | No  | Yes | No  | NA | NA | No  | No | Yes | NA | No pre/post                                          |
| <b>Soon et al. 2005 [43]</b>          | Yes | No  | No  | NA | NA | No  | No | No  | NA | Lack of comparison group, no control for confounding |

**Randomized Controlled Trials (n=3 papers reporting 1 RCT): Cochrane Collaboration Tool**

Study ID : Harper et al. 2005 [32]; Raine et al. 2005 [40]; Rocca et al. 2007 [41]

**Domain 1: Risk of bias arising from the randomization process**

| Signalling questions                                                                                       | EC use   | Pregnancy | Unprotected sex | Consistent condom use | Condom use last sex | Multiple partners | Contraceptive method change | Missed pills | Comments                                                                                                                    |
|------------------------------------------------------------------------------------------------------------|----------|-----------|-----------------|-----------------------|---------------------|-------------------|-----------------------------|--------------|-----------------------------------------------------------------------------------------------------------------------------|
| 1.1 Was the allocation sequence random?                                                                    | <u>Y</u> | <u>Y</u>  | <u>Y</u>        | <u>Y</u>              | <u>Y</u>            | <u>Y</u>          | <u>Y</u>                    | <u>Y</u>     |                                                                                                                             |
| 1.2 Was the allocation sequence concealed until participants were enrolled and assigned to interventions?  | <u>Y</u> | <u>Y</u>  | <u>Y</u>        | <u>Y</u>              | <u>Y</u>            | <u>Y</u>          | <u>Y</u>                    | <u>Y</u>     |                                                                                                                             |
| 1.3 Did baseline differences between intervention groups suggest a problem with the randomization process? | <u>N</u> | <u>N</u>  | <u>N</u>        | <u>N</u>              | <u>N</u>            | <u>N</u>          | <u>N</u>                    | <u>N</u>     | There was also a slightly higher proportion of blacks in the clinic access group (P=.045), but no other notable differences |
| Risk-of-bias judgement                                                                                     | Low      | Low       | Low             | Low                   | Low                 | Low               | Low                         | Low          |                                                                                                                             |
| Optional: What is the predicted direction of bias                                                          | NA       | NA        | NA              | NA                    | NA                  | NA                | NA                          | NA           |                                                                                                                             |

|                                         |  |  |  |  |  |  |  |  |  |
|-----------------------------------------|--|--|--|--|--|--|--|--|--|
| arising from the randomization process? |  |  |  |  |  |  |  |  |  |
|-----------------------------------------|--|--|--|--|--|--|--|--|--|

Domain 2: Risk of bias due to deviations from the intended interventions (*effect of assignment to intervention*)

| Signalling questions                                                                                                                | EC use   | Pregnancy | Unprotected sex | Consistent condom use | Condom use last sex | Multiple partners | Contraceptive method change | Missed pills | Comments                                                                                                 |
|-------------------------------------------------------------------------------------------------------------------------------------|----------|-----------|-----------------|-----------------------|---------------------|-------------------|-----------------------------|--------------|----------------------------------------------------------------------------------------------------------|
| 2.1. Were participants aware of their assigned intervention during the trial?                                                       | Y        | Y         | Y               | Y                     | Y                   | Y                 | Y                           | Y            | Blinding not possible given the intervention                                                             |
| 2.2. Were carers and people delivering the interventions aware of participants' assigned intervention during the trial?             | Y        | Y         | Y               | Y                     | Y                   | Y                 | Y                           | Y            |                                                                                                          |
| 2.3. If <b>Y/PY/NI</b> to 2.1 or 2.2: Were there deviations from the intended intervention that arose because of the trial context? | <u>N</u> | <u>N</u>  | <u>N</u>        | <u>N</u>              | <u>N</u>            | <u>N</u>          | <u>N</u>                    | <u>N</u>     | California legalized pharmacy access six months into the trial, but this is not related to trial context |
| 2.4 If <b>Y/PY</b> to 2.3: Were these deviations likely to have affected the outcome?                                               | NA       | NA        | NA              | NA                    | NA                  | NA                | NA                          | NA           |                                                                                                          |
| 2.5. If <b>Y/PY/NI</b> to 2.4: Were these deviations from intended intervention balanced between groups?                            | NA       | NA        | NA              | NA                    | NA                  | NA                | NA                          | NA           |                                                                                                          |
| 2.6 Was an appropriate analysis used to estimate the effect of assignment to intervention?                                          | <u>Y</u> | <u>Y</u>  | <u>Y</u>        | <u>Y</u>              | <u>Y</u>            | <u>Y</u>          | <u>Y</u>                    | <u>Y</u>     | Modified ITT used                                                                                        |

|                                                                                                                                                                               |     |     |     |     |     |     |     |     |  |
|-------------------------------------------------------------------------------------------------------------------------------------------------------------------------------|-----|-----|-----|-----|-----|-----|-----|-----|--|
| <b>2.7 If N/PN/NI to 2.6: Was there potential for a substantial impact (on the result) of the failure to analyse participants in the group to which they were randomized?</b> | NA  |  |
| <b>Risk-of-bias judgement</b>                                                                                                                                                 | Low |  |
| Optional: What is the predicted direction of bias due to deviations from intended interventions?                                                                              | NA  |  |

Domain 2: Risk of bias due to deviations from the intended interventions (*effect of adhering to intervention*)

| Signalling questions                                                                                                                  | EC use | Pregnancy | Unprotected sex | Consistent condom use | Condom use last sex | Multiple partners | Contraceptive method change | Missed pills | Comments                                                     |
|---------------------------------------------------------------------------------------------------------------------------------------|--------|-----------|-----------------|-----------------------|---------------------|-------------------|-----------------------------|--------------|--------------------------------------------------------------|
| 2.1. Were participants aware of their assigned intervention during the trial?                                                         | Y      | Y         | Y               | Y                     | Y                   | Y                 | Y                           | Y            | Blinding not possible given the intervention                 |
| 2.2. Were carers and people delivering the interventions aware of participants' assigned intervention during the trial?               | Y      | Y         | Y               | Y                     | Y                   | Y                 | Y                           | Y            |                                                              |
| 2.3. [If applicable:] If <b>Y/PY/NI</b> to 2.1 or 2.2: Were important non-protocol interventions balanced across intervention groups? | NA     | NA        | NA              | NA                    | NA                  | NA                | NA                          | NA           |                                                              |
| 2.4. [If applicable:] Were there failures in implementing the intervention that could have affected the outcome?                      | Y      | Y         | Y               | Y                     | Y                   | Y                 | Y                           | Y            | Yes, deviations because of change in CA law but rerandomized |
| 2.5. [If applicable:] Was there non-adherence to the assigned intervention regimen that could have affected participants' outcomes?   | PY     | PY        | PY              | PY                    | PY                  | PY                | PY                          | PY           | Contamination between groups due to change in law            |

|                                                                                                                                                                 |                     |                     |                     |                     |                     |                     |                     |                     |  |
|-----------------------------------------------------------------------------------------------------------------------------------------------------------------|---------------------|---------------------|---------------------|---------------------|---------------------|---------------------|---------------------|---------------------|--|
| <b>2.6. If <u>N/PN/NI</u> to 2.3, or <u>Y/PY/NI</u> to 2.4 or 2.5: Was an appropriate analysis used to estimate the effect of adhering to the intervention?</b> | <u>Y</u>            |  |
| <b>Risk-of-bias judgement</b>                                                                                                                                   | Some concerns       |  |
| Optional: What is the predicted direction of bias due to deviations from intended interventions?                                                                | Favors experimental |  |



## Domain 3: Missing outcome data

| Signalling questions                                                                                                    | EC use             | Pregnancy          | Unprotected sex    | Consistent condom use | Condom use last sex | Multiple partners  | Contraceptive method change | Missed pills       | Comments                                                                  |
|-------------------------------------------------------------------------------------------------------------------------|--------------------|--------------------|--------------------|-----------------------|---------------------|--------------------|-----------------------------|--------------------|---------------------------------------------------------------------------|
| <b>3.1 Were data for this outcome available for all, or nearly all, participants randomized?</b>                        | <a href="#">PY</a> | <a href="#">PY</a> | <a href="#">PY</a> | <a href="#">PY</a>    | <a href="#">PY</a>  | <a href="#">PY</a> | <a href="#">PY</a>          | <a href="#">PY</a> | 814/889 pharmacy access; 826/884 advance provision; 310/344 clinic access |
| <b>3.2 If <a href="#">N/PN/NI</a> to 3.1: Is there evidence that the result was not biased by missing outcome data?</b> | NA                 | NA                 | NA                 | NA                    | NA                  | NA                 | NA                          | NA                 |                                                                           |
| <b>3.3 If <a href="#">N/PN</a> to 3.2: Could missingness in the outcome depend on its true value?</b>                   | NA                 | NA                 | NA                 | NA                    | NA                  | NA                 | NA                          | NA                 |                                                                           |
| <b>3.4 If <a href="#">Y/PY/NI</a> to 3.3: Is it likely that missingness in the outcome depended on its true value?</b>  | NA                 | NA                 | NA                 | NA                    | NA                  | NA                 | NA                          | NA                 |                                                                           |
| <b>Risk-of-bias judgement</b>                                                                                           | Low                | Low                | Low                | Low                   | Low                 | Low                | Low                         | Low                |                                                                           |
| Optional: What is the predicted direction of bias due to missing outcome data?                                          | NA                 | NA                 | NA                 | NA                    | NA                  | NA                 | NA                          | NA                 |                                                                           |

## Domain 4: Risk of bias in measurement of the outcome

| Signalling questions                                                                                                            | EC use    | Pregnancy | Unprotected sex | Consistent condom use | Condom use last sex | Multiple partners | Contraceptive method change | Missed pills | Comments |
|---------------------------------------------------------------------------------------------------------------------------------|-----------|-----------|-----------------|-----------------------|---------------------|-------------------|-----------------------------|--------------|----------|
| 4.1 Was the method of measuring the outcome inappropriate?                                                                      | <u>N</u>  | <u>N</u>  | <u>N</u>        | <u>N</u>              | <u>N</u>            | <u>N</u>          | <u>N</u>                    | <u>N</u>     |          |
| 4.2 Could measurement or ascertainment of the outcome have differed between intervention groups?                                | <u>N</u>  | <u>N</u>  | <u>N</u>        | <u>N</u>              | <u>N</u>            | <u>N</u>          | <u>N</u>                    | <u>N</u>     |          |
| 4.3 If <u>N/PN/NI</u> to 4.1 and 4.2: Were outcome assessors aware of the intervention received by study participants?          | Y         | Y         | Y               | Y                     | Y                   | Y                 | Y                           | Y            |          |
| 4.4 If <u>Y/PY/NI</u> to 4.3: Could assessment of the outcome have been influenced by knowledge of intervention received?       | <u>PN</u> | <u>PN</u> | <u>PN</u>       | <u>PN</u>             | <u>PN</u>           | <u>PN</u>         | <u>PN</u>                   | <u>PN</u>    |          |
| 4.5 If <u>Y/PY/NI</u> to 4.4: Is it likely that assessment of the outcome was influenced by knowledge of intervention received? | <u>PN</u> | <u>PN</u> | <u>PN</u>       | <u>PN</u>             | <u>PN</u>           | <u>PN</u>         | <u>PN</u>                   | <u>PN</u>    |          |

|                                                                                  |     |     |     |     |     |     |     |     |  |
|----------------------------------------------------------------------------------|-----|-----|-----|-----|-----|-----|-----|-----|--|
| <b>Risk-of-bias judgement</b>                                                    | Low |  |
| Optional: What is the predicted direction of bias in measurement of the outcome? | NA  |  |

## Domain 5: Risk of bias in selection of the reported result

| Signalling questions                                                                                                                                                                       | EC use   | Pregnancy | Unprotected sex | Consistent condom use | Condom use last sex | Multiple partners | Contraceptive method change | Missed pills | Comments |
|--------------------------------------------------------------------------------------------------------------------------------------------------------------------------------------------|----------|-----------|-----------------|-----------------------|---------------------|-------------------|-----------------------------|--------------|----------|
| <b>5.1 Were the data that produced this result analysed in accordance with a pre-specified analysis plan that was finalized before unblinded outcome data were available for analysis?</b> |          |           |                 |                       |                     |                   |                             |              |          |
|                                                                                                                                                                                            | <u>Y</u> | <u>Y</u>  | <u>Y</u>        | <u>Y</u>              | <u>Y</u>            | <u>Y</u>          | <u>Y</u>                    | <u>Y</u>     |          |
| <b>Is the numerical result being assessed likely to have been selected, on the basis of the results, from...</b>                                                                           |          |           |                 |                       |                     |                   |                             |              |          |
| <b>5.2. ... multiple eligible outcome measurements (e.g. scales, definitions, time points) within the outcome domain?</b>                                                                  | <u>N</u> | <u>N</u>  | <u>N</u>        | <u>N</u>              | <u>N</u>            | <u>N</u>          | <u>N</u>                    | <u>N</u>     |          |
| <b>5.3 ... multiple eligible analyses of the data?</b>                                                                                                                                     | <u>N</u> | <u>N</u>  | <u>N</u>        | <u>N</u>              | <u>N</u>            | <u>N</u>          | <u>N</u>                    | <u>N</u>     |          |
| <b>Risk-of-bias judgement</b>                                                                                                                                                              | Low      | Low       | Low             | Low                   | Low                 | Low               | Low                         | Low          |          |
| Optional: What is the predicted direction of bias due to selection of the reported result?                                                                                                 | NA       | NA        | NA              | NA                    | NA                  | NA                | NA                          | NA           |          |

## Overall risk of bias

| Overall assessment                                                          | EC use | Pregnancy | Unprotected sex | Consistent condom use | Condom use last sex | Multiple partners | Contraceptive method change | Missed pills | Comments |
|-----------------------------------------------------------------------------|--------|-----------|-----------------|-----------------------|---------------------|-------------------|-----------------------------|--------------|----------|
| Risk-of-bias judgement                                                      | Low    | Low       | Low             | Low                   | Low                 | Low               | Low                         | Low          |          |
| Optional: What is the overall predicted direction of bias for this outcome? | NA     | NA        | NA              | NA                    | NA                  | NA                | NA                          | NA           |          |
